# Supplementary material
Source: PubMed Central journal article supplement (PMC8052194)
Supplement: mmc6.pdf [file mmc6.pdf]

TableS5: 96 genes identified from trajectory analysis

| gene           | Module | Correlation with severity | Severe vs non-severe effect size | Severe vs non-severe FDR |
|----------------|--------|---------------------------|----------------------------------|--------------------------|
| <i>TXN</i>     | 1      | 0.49                      | 1.65                             | 2.00E-74                 |
| <i>ORM1</i>    | 1      | 0.16                      | 1.58                             | 4.77E-72                 |
| <i>PFKFB4</i>  | 1      | 0.43                      | 1.50                             | 4.69E-62                 |
| <i>SLPI</i>    | 1      | 0.36                      | 1.44                             | 2.71E-65                 |
| <i>BCL6</i>    | 1      | 0.35                      | 1.32                             | 4.41E-56                 |
| <i>NQO2</i>    | 1      | 0.23                      | 1.26                             | 8.14E-49                 |
| <i>AQP9</i>    | 1      | 0.41                      | 1.19                             | 4.70E-50                 |
| <i>ANXA3</i>   | 1      | 0.52                      | 1.07                             | 7.38E-42                 |
| <i>DOK3</i>    | 1      | 0.44                      | 1.07                             | 5.89E-42                 |
| <i>KLHL2</i>   | 1      | 0.20                      | 1.01                             | 1.09E-38                 |
| <i>TYK2</i>    | 1      | -0.02                     | 1.01                             | 1.31E-35                 |
| <i>TLN1</i>    | 1      | 0.16                      | 0.88                             | 4.78E-31                 |
| <i>ACSL1</i>   | 1      | 0.38                      | 0.80                             | 2.31E-29                 |
| <i>SRGN</i>    | 1      | 0.38                      | 0.69                             | 1.04E-20                 |
| <i>GRN</i>     | 1      | 0.51                      | 0.58                             | 3.52E-16                 |
| <i>ADM</i>     | 1      | 0.56                      | 0.53                             | 3.20E-16                 |
| <i>NUCB1</i>   | 1      | 0.38                      | 0.48                             | 1.16E-11                 |
| <i>TLR2</i>    | 1      | 0.25                      | 0.38                             | 6.12E-07                 |
| <i>BCL2A1</i>  | 1      | 0.33                      | 0.18                             | 6.69E-04                 |
| <i>CAMP</i>    | 2      | 0.40                      | 1.54                             | 1.32E-75                 |
| <i>LCN2</i>    | 2      | 0.35                      | 1.40                             | 7.32E-65                 |
| <i>DEFA4</i>   | 2      | 0.29                      | 1.35                             | 1.44E-57                 |
| <i>CTSG</i>    | 2      | 0.28                      | 1.31                             | 1.30E-66                 |
| <i>CEACAM8</i> | 2      | 0.31                      | 1.30                             | 1.31E-57                 |
| <i>BCAT1</i>   | 2      | 0.41                      | 1.26                             | 1.08E-55                 |
| <i>BTBD7</i>   | 2      | 0.22                      | 1.23                             | 1.06E-45                 |
| <i>KIF15</i>   | 2      | 0.43                      | 1.19                             | 2.41E-54                 |
| <i>AZU1</i>    | 2      | 0.27                      | 1.17                             | 1.74E-58                 |
| <i>CEP55</i>   | 2      | 0.45                      | 1.16                             | 2.76E-58                 |
| <i>PRC1</i>    | 2      | 0.37                      | 1.16                             | 2.30E-56                 |
| <i>HMMR</i>    | 2      | 0.46                      | 1.06                             | 1.15E-51                 |
| <i>BCL2L11</i> | 2      | 0.39                      | 1.02                             | 2.58E-39                 |
| <i>CDT1</i>    | 2      | 0.42                      | 0.96                             | 1.50E-40                 |
| <i>TCEAL9</i>  | 2      | 0.35                      | 0.90                             | 1.62E-41                 |
| <i>OLR1</i>    | 2      | 0.33                      | 0.89                             | 1.47E-42                 |
| <i>TRIP13</i>  | 2      | 0.39                      | 0.87                             | 1.07E-34                 |
| <i>ELL2</i>    | 2      | 0.41                      | 0.74                             | 7.34E-25                 |
| <i>SOCS6</i>   | 2      | 0.23                      | 0.69                             | 8.49E-21                 |

|                 |   |       |       |          |
|-----------------|---|-------|-------|----------|
| <b>IGFBP2</b>   | 2 | 0.26  | 0.66  | 2.89E-22 |
| <b>ATP8B4</b>   | 2 | 0.48  | 0.61  | 8.36E-18 |
| <b>KIF23</b>    | 2 | 0.47  | 0.31  | 1.09E-07 |
| <b>UBE2L6</b>   | 3 | 0.29  | -1.84 | 9.42E-79 |
| <b>CASP7</b>    | 3 | 0.09  | -1.44 | 1.46E-58 |
| <b>OASL</b>     | 3 | 0.54  | -1.32 | 1.52E-54 |
| <b>TMEM123</b>  | 3 | 0.16  | -1.32 | 1.08E-51 |
| <b>VRK2</b>     | 3 | 0.25  | -1.26 | 1.46E-49 |
| <b>NAPA</b>     | 3 | 0.16  | -1.09 | 1.64E-41 |
| <b>CCL2</b>     | 3 | 0.26  | -1.09 | 1.30E-66 |
| <b>MAFB</b>     | 3 | 0.32  | -1.09 | 1.88E-38 |
| <b>VAMP5</b>    | 3 | 0.46  | -1.07 | 1.15E-38 |
| <b>ATG3</b>     | 3 | 0.18  | -1.01 | 4.36E-38 |
| <b>FAM8A1</b>   | 3 | 0.08  | -0.89 | 1.22E-27 |
| <b>LAPTM4A</b>  | 3 | -0.12 | -0.84 | 3.61E-29 |
| <b>ANXA2</b>    | 3 | 0.13  | -0.80 | 2.18E-26 |
| <b>SSR2</b>     | 3 | -0.34 | -0.80 | 3.69E-21 |
| <b>IFITM3</b>   | 3 | 0.59  | -0.41 | 6.10E-07 |
| <b>POMP</b>     | 3 | 0.31  | -0.36 | 6.49E-11 |
| <b>IFITM1</b>   | 3 | 0.54  | -0.29 | 1.15E-03 |
| <b>CREG1</b>    | 3 | 0.33  | -0.24 | 9.71E-05 |
| <b>SCAND1</b>   | 3 | 0.20  | -0.04 | 4.70E-01 |
| <b>RAD23B</b>   | 3 | -0.04 | 0.18  | 5.42E-01 |
| <b>H1-0</b>     | 3 | 0.45  | 0.51  | 2.97E-12 |
| <b>IFITM2</b>   | 3 | 0.49  | 0.77  | 2.58E-26 |
| <b>FURIN</b>    | 3 | 0.17  | 0.88  | 5.33E-30 |
| <b>HLA-DPB1</b> | 4 | -0.41 | -1.82 | 1.64E-81 |
| <b>SMYD2</b>    | 4 | -0.39 | -1.39 | 1.67E-57 |
| <b>SIDT1</b>    | 4 | -0.44 | -1.39 | 2.30E-61 |
| <b>TRIB2</b>    | 4 | -0.29 | -1.35 | 1.20E-57 |
| <b>DOK2</b>     | 4 | -0.26 | -1.24 | 2.23E-52 |
| <b>KLRB1</b>    | 4 | -0.49 | -1.13 | 2.03E-49 |
| <b>EXOC2</b>    | 4 | -0.22 | -1.11 | 2.40E-45 |
| <b>BUB3</b>     | 4 | -0.40 | -1.11 | 8.75E-42 |
| <b>KLRG1</b>    | 4 | -0.38 | -0.97 | 1.14E-32 |
| <b>PRSS23</b>   | 4 | -0.33 | -0.96 | 1.90E-30 |
| <b>KLRD1</b>    | 4 | -0.27 | -0.89 | 7.73E-28 |
| <b>PRF1</b>     | 4 | -0.24 | -0.89 | 8.60E-30 |
| <b>USP11</b>    | 4 | -0.40 | -0.85 | 7.63E-30 |
| <b>BANF1</b>    | 4 | -0.21 | -0.84 | 1.65E-25 |
| <b>CHMP7</b>    | 4 | -0.47 | -0.84 | 3.29E-28 |
| <b>RBM15B</b>   | 4 | -0.37 | -0.81 | 3.64E-22 |

|                 |   |       |       |          |
|-----------------|---|-------|-------|----------|
| <b>MAP3K4</b>   | 4 | -0.42 | -0.81 | 1.45E-25 |
| <b>ITGB7</b>    | 4 | -0.25 | -0.75 | 2.12E-22 |
| <b>EPHX2</b>    | 4 | -0.46 | -0.69 | 1.46E-18 |
| <b>IL7R</b>     | 4 | -0.40 | -0.69 | 2.09E-19 |
| <b>DDB1</b>     | 4 | -0.41 | -0.67 | 3.59E-18 |
| <b>LRBA</b>     | 4 | -0.41 | -0.64 | 1.63E-16 |
| <b>TRAF5</b>    | 4 | -0.54 | -0.60 | 2.18E-13 |
| <b>ARHGAP45</b> | 4 | -0.38 | -0.59 | 2.09E-14 |
| <b>CCR7</b>     | 4 | -0.40 | -0.57 | 5.13E-12 |
| <b>PITPNC1</b>  | 4 | -0.51 | -0.54 | 5.99E-12 |
| <b>TRAF3IP3</b> | 4 | -0.38 | -0.54 | 7.38E-13 |
| <b>LTBP3</b>    | 4 | -0.43 | -0.51 | 6.66E-11 |
| <b>FBLN5</b>    | 4 | -0.30 | -0.51 | 4.31E-11 |
| <b>TRIM28</b>   | 4 | -0.36 | -0.51 | 2.64E-12 |
| <b>PIK3R1</b>   | 4 | -0.33 | -0.32 | 1.87E-05 |
| <b>EZH1</b>     | 4 | -0.29 | 0.14  | 2.29E-01 |
